# Supplementary material for: Assessment of Ecosystem Service Value and Social Costs of Carbon Emissions in Island Ecosystems: A Case Study of Zhoushan Archipelago
Source: Preprints.org preprint supplement (doi:10.20944/preprints202401.0217.v1), 2024-01-03
Supplement: Supplementary file 1 [file supplementary]

**Author information：**

Qian Zhou, College of Marine Science and Technology, Zhejiang Ocean University, Zhoushan 316022, China; [zhouqian@zjou.edu.cn](mailto:zhouqian@zjou.edu.cn);

Feng Gui, College of Marine Science and Technology, Zhejiang Ocean University, Zhoushan 316022, China; [fgui@zjou.edu.cn](mailto:fgui@zjou.edu.cn);

Benxuan Zhao, Zhejiang Zhonglan Environmental Technology Co. Ltd; Wenzhou, 325000, China; [zbx515@163.com](mailto:zbx515@163.com);

Jingyi Liu, National Engineering Research Center for Marine Aquaculture, Zhejiang Ocean University, Zhoushan 316022, China; [liujingyi@zjou.edu.cn](mailto:liujingyi@zjou.edu.cn);

Huiwen Cai, College of Marine Science and Technology, Zhejiang Ocean University, Zhoushan 316022, China; [caihuiwen@zjou.edu.cn](mailto:caihuiwen@zjou.edu.cn);

Kaida Xu, Zhejiang Province Key Laboratory of Mariculture and Enhancement, Zhejiang Marine Fisheries Research Institute, Zhoushan 316022, China; [h01011@zjou.edu.cn](mailto:h01011@zjou.edu.cn);

Sheng Zhao, Correspondence, College of Marine Science and Technology, Zhejiang Ocean University, Zhoushan 316022, China; [zhaosh@zjou.edu.cn](mailto:zhaosh@zjou.edu.cn).

**Funding:**

This study is sponsored by the National Key R&D Program of China (No. 2019YFD0901204);

the Fundamental Research Funds for Zhejiang Provincial Universities and Research Institutes (No.2021JD006); and the Key R&D Program of Zhejiang Province (No. 2019C02056).
